# Supplementary material for: Prevalence of urogenital and intestinal schistosomiasis among school children in South-west Nigeria
Source: PubMed Central journal article supplement (PMC8345861; doi:10.1371/journal.pntd.0009628), 2021-07-27
Supplement: pntd.0009628.s001.pdf [file pntd.0009628.s001.pdf]

# PLOS Neglected Tropical Diseases

## Epidemiology of mixed urogenital and intestinal schistosomiasis among school children in two endemic communities of Southern Nigeria --Manuscript Draft--

|                                                                                                                                                                                                                                                                                                                                                                                                                                         |                                                                                                                                                                                                                                                                                                                                                                                                                                                                                                                                                                                                                                                                                                                                                                                                                                                                                                                                                                                                                                                                                                                                                                                                                                                                                                                                                                                                                                                                                                                                                                                                                                                                                                                                                                                                                                                                                                                                                                                                                                                                                                                                                                                                                                                                                                                                                                                   |
|-----------------------------------------------------------------------------------------------------------------------------------------------------------------------------------------------------------------------------------------------------------------------------------------------------------------------------------------------------------------------------------------------------------------------------------------|-----------------------------------------------------------------------------------------------------------------------------------------------------------------------------------------------------------------------------------------------------------------------------------------------------------------------------------------------------------------------------------------------------------------------------------------------------------------------------------------------------------------------------------------------------------------------------------------------------------------------------------------------------------------------------------------------------------------------------------------------------------------------------------------------------------------------------------------------------------------------------------------------------------------------------------------------------------------------------------------------------------------------------------------------------------------------------------------------------------------------------------------------------------------------------------------------------------------------------------------------------------------------------------------------------------------------------------------------------------------------------------------------------------------------------------------------------------------------------------------------------------------------------------------------------------------------------------------------------------------------------------------------------------------------------------------------------------------------------------------------------------------------------------------------------------------------------------------------------------------------------------------------------------------------------------------------------------------------------------------------------------------------------------------------------------------------------------------------------------------------------------------------------------------------------------------------------------------------------------------------------------------------------------------------------------------------------------------------------------------------------------|
| <b>Manuscript Number:</b>                                                                                                                                                                                                                                                                                                                                                                                                               | PNTD-D-20-01655                                                                                                                                                                                                                                                                                                                                                                                                                                                                                                                                                                                                                                                                                                                                                                                                                                                                                                                                                                                                                                                                                                                                                                                                                                                                                                                                                                                                                                                                                                                                                                                                                                                                                                                                                                                                                                                                                                                                                                                                                                                                                                                                                                                                                                                                                                                                                                   |
| <b>Full Title:</b>                                                                                                                                                                                                                                                                                                                                                                                                                      | Epidemiology of mixed urogenital and intestinal schistosomiasis among school children in two endemic communities of Southern Nigeria                                                                                                                                                                                                                                                                                                                                                                                                                                                                                                                                                                                                                                                                                                                                                                                                                                                                                                                                                                                                                                                                                                                                                                                                                                                                                                                                                                                                                                                                                                                                                                                                                                                                                                                                                                                                                                                                                                                                                                                                                                                                                                                                                                                                                                              |
| <b>Short Title:</b>                                                                                                                                                                                                                                                                                                                                                                                                                     | Mixed urogenital and intestinal schistosomiasis among school children in Nigeria                                                                                                                                                                                                                                                                                                                                                                                                                                                                                                                                                                                                                                                                                                                                                                                                                                                                                                                                                                                                                                                                                                                                                                                                                                                                                                                                                                                                                                                                                                                                                                                                                                                                                                                                                                                                                                                                                                                                                                                                                                                                                                                                                                                                                                                                                                  |
| <b>Article Type:</b>                                                                                                                                                                                                                                                                                                                                                                                                                    | Research Article                                                                                                                                                                                                                                                                                                                                                                                                                                                                                                                                                                                                                                                                                                                                                                                                                                                                                                                                                                                                                                                                                                                                                                                                                                                                                                                                                                                                                                                                                                                                                                                                                                                                                                                                                                                                                                                                                                                                                                                                                                                                                                                                                                                                                                                                                                                                                                  |
| <b>Keywords:</b>                                                                                                                                                                                                                                                                                                                                                                                                                        | schistosomiasis, Schistosoma haematobium, Schistosoma mansoni, ectopic eggs, mixed infection, Nigeria                                                                                                                                                                                                                                                                                                                                                                                                                                                                                                                                                                                                                                                                                                                                                                                                                                                                                                                                                                                                                                                                                                                                                                                                                                                                                                                                                                                                                                                                                                                                                                                                                                                                                                                                                                                                                                                                                                                                                                                                                                                                                                                                                                                                                                                                             |
| <b>Abstract:</b>                                                                                                                                                                                                                                                                                                                                                                                                                        | <p><b>Background:</b> The risk of co-infection with <i>Schistosoma haematobium</i> and <i>S. mansoni</i> and the potential harmful effect on morbidity and control is enhanced by the overlapping distribution of both species in sub-Saharan Africa. Despite the reported high endemicity of <i>S. haematobium</i> and <i>S. mansoni</i> in Nigeria, studies on the spread and impact of their mixed infection are limited. We present the analysis of mixed <i>S. haematobium</i> and <i>S. mansoni</i> infection and ectopic egg elimination of schistosome egg in school children in Osun State Nigeria.</p> <p><b>Methods :</b> The presence of the <i>S. haematobium</i> egg was detected in urine using the urine filtration technique while <i>S. mansoni</i> was detected in stool using Kato–Katz thick smear.</p> <p><b>Results:</b> A total of 466 (211 (45.3%) males vs. 255 (54.7%) females; mean age 11.6 ± 3.16 years) primary and secondary school children were enrolled for the study. The overall prevalence of schistosomiasis was 40% (185/466) with 19% (89/466) recording single <i>S. haematobium</i> infection (geometric egg count = 189.4 egg/10ml urine; 95% CI: range 115.9-262.9), and 9% (41/465) recording single <i>S. mansoni</i> infection (geometric egg count = 115.7 epg; 95% CI: range 78.4-152.9). The prevalence of ectopic <i>S. mansoni</i> was 4.7%, while no ectopic <i>S. haematobium</i> was recorded. Mixed infection of <i>S. haematobium</i> / <i>S. mansoni</i> had a prevalence of 9.5% (44/466). More females (54.5%) presented with <i>S. haematobium</i> / <i>S. mansoni</i> co-infection. For both parasites, males had higher infection intensity, with significant difference observed with <i>S. haematobium</i> (<math>p=0.0004</math>). Hematuria was significant in individuals with single <i>S. haematobium</i> infection (<math>p=0.002</math>), mixed ectopic <i>S. haematobium</i> / <i>S. mansoni</i> (<math>p=0.009</math>) and mixed <i>S. haematobium</i> / <i>S. mansoni</i> /ectopic <i>S. mansoni</i> (<math>p=0.0003</math>).</p> <p><b>Conclusions:</b> These findings suggest the probability of interspecific interactions between <i>S. haematobium</i> and <i>S. mansoni</i>. Scaling up of mass administration of praziquantel and control measures in the study areas is highly desirable.</p> |
| <b>Additional Information:</b>                                                                                                                                                                                                                                                                                                                                                                                                          |                                                                                                                                                                                                                                                                                                                                                                                                                                                                                                                                                                                                                                                                                                                                                                                                                                                                                                                                                                                                                                                                                                                                                                                                                                                                                                                                                                                                                                                                                                                                                                                                                                                                                                                                                                                                                                                                                                                                                                                                                                                                                                                                                                                                                                                                                                                                                                                   |
| <b>Question</b>                                                                                                                                                                                                                                                                                                                                                                                                                         | <b>Response</b>                                                                                                                                                                                                                                                                                                                                                                                                                                                                                                                                                                                                                                                                                                                                                                                                                                                                                                                                                                                                                                                                                                                                                                                                                                                                                                                                                                                                                                                                                                                                                                                                                                                                                                                                                                                                                                                                                                                                                                                                                                                                                                                                                                                                                                                                                                                                                                   |
| <p><b>Financial Disclosure</b></p> <p>Enter a financial disclosure statement that describes the sources of funding for the work included in this submission. Review the <a href="#">submission guidelines</a> for detailed requirements. View published research articles from <a href="#">PLOS NTDs</a> for specific examples.</p> <p>This statement is required for submission and <b>will appear in the published article</b> if</p> | The author(s) received no specific funding for this work                                                                                                                                                                                                                                                                                                                                                                                                                                                                                                                                                                                                                                                                                                                                                                                                                                                                                                                                                                                                                                                                                                                                                                                                                                                                                                                                                                                                                                                                                                                                                                                                                                                                                                                                                                                                                                                                                                                                                                                                                                                                                                                                                                                                                                                                                                                          |

the submission is accepted. Please make sure it is accurate.

#### Unfunded studies

Enter: *The author(s) received no specific funding for this work.*

#### Funded studies

Enter a statement with the following details:

- Initials of the authors who received each award
- Grant numbers awarded to each author
- The full name of each funder
- URL of each funder website
- Did the sponsors or funders play any role in the study design, data collection and analysis, decision to publish, or preparation of the manuscript?
- **NO** - Include this sentence at the end of your statement: *The funders had no role in study design, data collection and analysis, decision to publish, or preparation of the manuscript.*
- **YES** - Specify the role(s) played.

\* typeset

#### Competing Interests

Use the instructions below to enter a competing interest statement for this submission. On behalf of all authors, disclose any [competing interests](#) that could be perceived to bias this work—acknowledging all financial support and any other relevant financial or non-financial competing interests.

This statement **will appear in the published article** if the submission is accepted. Please make sure it is accurate. View published research articles

The authors have declared that no competing interests exist.

from [PLOS NTDs](#) for specific examples.

**NO authors have competing interests**

Enter: *The authors have declared that no competing interests exist.*

**Authors with competing interests**

Enter competing interest details beginning with this statement:

*I have read the journal's policy and the authors of this manuscript have the following competing interests: [insert competing interests here]*

\* typeset

**Data Availability**

Yes - all data are fully available without restriction

Authors are required to make all data underlying the findings described fully available, without restriction, and from the time of publication. PLOS allows rare exceptions to address legal and ethical concerns. See the [PLOS Data Policy](#) and [FAQ](#) for detailed information.

A Data Availability Statement describing where the data can be found is required at submission. Your answers to this question constitute the Data Availability Statement and **will be published in the article**, if accepted.

**Important:** Stating 'data available on request from the author' is not sufficient. If your data are only available upon request, select 'No' for the first question and explain your exceptional situation in the text box.

Do the authors confirm that all data underlying the findings described in their manuscript are fully available without restriction?

**Describe where the data may be found in full sentences. If you are copying our sample text, replace any instances of XXX with the appropriate details.**

- If the data are **held or will be held in a public repository**, include URLs, accession numbers or DOIs. If this information will only be available after acceptance, indicate this by ticking the box below. For example: *All XXX files are available from the XXX database (accession number(s) XXX, XXX).*
- If the data are all contained **within the manuscript and/or Supporting Information files**, enter the following: *All relevant data are within the manuscript and its Supporting Information files.*
- If neither of these applies but you are able to provide **details of access elsewhere**, with or without limitations, please do so. For example:

*Data cannot be shared publicly because of [XXX]. Data are available from the XXX Institutional Data Access / Ethics Committee (contact via XXX) for researchers who meet the criteria for access to confidential data.*

*The data underlying the results presented in the study are available*

The data that support the findings of this study are available from the corresponding author, [OO], upon reasonable request

*from (include the name of the third party and contact information or URL).*

- This text is appropriate if the data are owned by a third party and authors do not have permission to share the data.

\* typeset

Additional data availability information:

1 **Epidemiology of ked urogenital and intestinal schistosomiasis among school children**  
2 **in two endemic communities of Southern Nigeria**

3 Johnson A. Ojo<sup>1</sup>, Samuel A. Adedokun<sup>1</sup>, Akeem A. Akindele<sup>1</sup>, Adedolapo B. Olorunfemi<sup>1</sup>,  
4 Olawumi A. Otutu<sup>1</sup>, Taiwo A. Ojurongbe<sup>2</sup>, Bolaji N. Thomas<sup>3</sup>, Thirumalaisamy P. Velavan<sup>4,5</sup>‡,  
5 Olusola Ojurongbe<sup>1</sup>‡.

6

7 <sup>1</sup>Department of Medical Microbiology & Parasitology, Ladoke Akintola University of Technology,  
8 Osogbo, Nigeria

9 <sup>2</sup>Department of Mathematical Sciences, Osun State University, Osogbo, Nigeria

10 <sup>3</sup>Department of Biomedical Sciences, College of Health Sciences and Technology, Rochester  
11 Institute of Technology, Rochester NY, USA

12 <sup>4</sup>Institute of Tropical Medicine, University of Tübingen, Germany

13 <sup>5</sup>Duy Tan University, Da Nang, Vietnam

14

15 *‡Joint senior author*

16

17 **Corresponding author**

18 Olusola Ojurongbe

19 Email: [oojurongbe@lautech.edu.ng](mailto:oojurongbe@lautech.edu.ng)

20

21

22

23

24 **ABSTRACT**

25 **Background:** The risk of co-infection with *Schistosoma haematobium* and *S. mansoni* and the  
26 potential harmful effect on morbidity and control is enhanced by the overlapping distribution of  
27 both species in sub-Saharan Africa. Despite the reported high endemicity of *S. haematobium*  
28 and *S. mansoni* in Nigeria, studies on the spread and impact of their mixed infection are limited.  
29 We present the analysis of mixed *S. haematobium* and *S. mansoni* infection and ectopic egg  
30 elimination of schistosome egg in school children in Osun State Nigeria.

31 **Methods:** The presence of the *S. haematobium* egg was detected in urine using the urine  
32 filtration technique while *S. mansoni* was detected in stool using Kato–Katz thick smear.

33 **Results:** A total of 466 (211 (45.3%) males vs. 255 (54.7%) females; mean age  $11.6 \pm 3.16$   
34 years) primary and secondary school children were enrolled for the study. The overall  
35 prevalence of schistosomiasis was 40% (185/466) with 19% (89/466) recording single *S.*  
36 *haematobium* infection (geometric egg count = 189.4 egg/10ml urine; 95% CI: range 115.9-  
37 262.9), and 9% (41/465) recording single *S. mansoni* infection (geometric egg count = 115.7  
38 egg; 95% CI: range 78.4-152.9). The prevalence of ectopic *S. mansoni* was 4.7%, while no  
39 ectopic *S. haematobium* was recorded. Mixed infection of *S. haematobium/S. mansoni* had a  
40 prevalence of 9.5% (44/466). More females (54.5%) presented with *S. haematobium/S.*  
41 *mansoni* co-infection. For both parasites, males had higher infection intensity, with significant  
42 difference observed with *S. haematobium* ( $p=0.0004$ ). Hematuria was significant in individuals  
43 with single *S. haematobium* infection ( $p=0.002$ ), mixed ectopic *S. haematobium/S. mansoni*  
44 ( $p=0.009$ ) and mixed *S. haematobium/S. mansoni*/ectopic *S. mansoni* ( $p=0.0003$ ).

45 **Conclusions:** These findings suggest the probability of interspecific interactions between *S.*  
46 *haematobium* and *S. mansoni*. Scaling up of mass administration of praziquantel and control  
47 measures in the study areas is highly desirable.

48 **Keywords:** schistosomiasis, *Schistosoma haematobium*, *Schistosoma mansoni*, ectopic eggs,  
49 mixed infection, Nigeria

## 50 INTRODUCTION

51 Schistosomiasis, a neglected tropical diseases targeted for elimination by the World Health  
52 Organization [1], is a major public health problem, with Nigeria [2–5], ranking first among African  
53 countries with the highest disease burden [6]. The disease is caused by parasites of the genus  
54 *Schistosoma* and is responsible for the most obvious reduction in age-standardized years lived  
55 with disability (YLD) between 2006 and 2016 [7]. The most affected group are the school-aged  
56 children, involved with one water contact activity or the other that brings them in contact with the  
57 free-swimming cercariae, released from infected snail species in freshwater [4] [8]. The disease  
58 is present in 78 countries, affecting more than 250 million people annually, and presenting with  
59 two major forms; a urogenital disease caused by *S. haematobium* and an intestinal disease  
60 caused by *S. mansoni*, *S. japonicum*, *S. mekongi*, and *S. intercalatum*. *S. haematobium* (*Sh*)  
61 and *S. mansoni* (*Sm*) are the two major species endemic in sub-Saharan Africa, along with a  
62 few cases of *S. intercalatum*, localized in rain forest areas of Central Africa [1]. [9]

63

64 Urogenital schistosomiasis is associated with pathological outcomes, such as hematuria,  
65 bladder cancer, and hydronephrosis, while chronic intestinal disease is characterized by  
66 hepatomegaly, splenomegaly, and progressive periportal fibrosis resulting in portal  
67 hypertension, esophageal varices, liver surface irregularities, portal-systemic venous shunts,  
68 and hematemesis [9,10]. The impaired physical and cognitive development arising from chronic  
69 infection among children is a major concern in many parts of the world [13]. The risk of co-  
70 infection with *Sh* and *Sm* is greatly enhanced by the overlapping distribution of both species in  
71 Africa [11]. However, there is a paucity of information on the determinants, distribution and the  
72 impact of such mixed infections on endemic populations. Results from co-infection in  
73 experimental models show the two species could form heterologous male–female pairs, with the  
74 male carrying the female to its preferred site for oviposition and the female producing eggs  
75 characteristic of her species in an uncharacteristic site [15,16]. This phenomenon referred to as



76 hybridization is believed to be responsible for ectopic egg elimination resulting in the detection  
77 of *Sm* eggs in urine or *Sh* eggs in feces, in areas where mixed infection occur [14, 15], and  
78 suggestive of possible sexual interactions in nature between *Sh* and *Sm*. Nevertheless,  
79 hybridization which was not previously reported from human schistosomes species in Africa,  
80 was recently observed in France from a patient originally from Côte d'Ivoire [16, 17]. It is  
81 believed that disease epidemiology and phenotypic characteristics could be altered by  
82 hybridization, which ultimately could affect transmission and host compatibility of the parasite  
83 [18, 19].

84

85 An increasing number of foci where co-infections between *Sh* and *Sm* occurs has been reported  
86 in some parts of Africa [14, 20–22]. In some of these foci, differences in schistosomiasis-  
87 associated morbidity as well as infection intensity has been reported between single and mixed  
88 infections [22]. Understanding the epidemiology of mixed infections therefore, will help us to  
89 answer important standing questions on the underlying mechanisms towards morbidity and the  
90 development of effective strategies for the prevention and control of schistosomiasis in co-  
91 endemic areas. Both *Sh* and *Sm* occur in Nigeria with *Sh* having higher prevalence. While quite  
92 a number of studies have reported the occurrence of both species in the same foci there has  
93 been no information in the possible ectopic egg elimination and its impact on infection intensity.  
94 In this report, we present results from a cross-sectional study conducted to investigate possible  
95 mixed *Schistosoma* infections and associated disease covariates in two schistosomiasis  
96 endemic communities in Nigeria.

97

## 98 **Material and methods**

### 99 **Study site**

100 This study was conducted among school children (age 4–19 years), recruited from Ore and Ilie  
101 communities, Osun State, Nigeria. Urine and stool samples were collected from the primary and

102 secondary school pupils in these communities, who consented or whose parents/guardian gave  
103 consent to participate in this study. The two communities are located very closely on latitude  
104 4°34' and 4°36'E, and Longitude 7°56' and 7°58'N, and only separated by a dam in the rain  
105 forest zone. The dam owned and managed by the State Water Corporation, Olorunda local  
106 government area, southwest Nigeria is believed to be the breeding site of *Schistosoma* in the  
107 area owing to abundant presence of snail intermediate host in the dam. These communities  
108 depend on the dam for their domestic water supply, fishing and other water related activities.  
109 These communities were chosen because of the previous reports of schistosome endemicity  
110 [23], and a the presence of the dam.

111

### 112 **Sample Collection**

113 The sample size was obtained, using the formula for a cross-sectional study [24]. Using a prior  
114 prevalence of 37.5% among school children positive for schistosomiasis [23], a marginal error of  
115 5% and a type 1 error of 5%, a minimum sample of 289 school children was needed. In all, 466  
116 school children participated in this study. Individual demographic information was collected with  
117 a structured questionnaire, while two sterile, universal containers, individually labelled for urine  
118 and stool collection, were distributed to consenting school children. Instructions on proper urine  
119 and stool collection procedure was given to the students; for each participant, one urine and  
120 stool samples were collected.

121

### 122 **Parasitological examination**

123 The presence of the *Sh* egg was detected using the urine filtration technique, as previously  
124 described [4]. Briefly, 10 ml of the freshly passed urine sample was pushed through a micro-  
125 filter membrane of 10–12 µm (MF, Whatman, New Jersey, USA) using a syringe. The micro-  
126 filter membrane was then carefully placed on a glass slide, mounted on a microscope and  
127 examined using a low-power objective (10x) of a light microscope. For stool analysis, two Kato–

128 Katz thick smear were prepared using 41.7 mg template of the stool material each and  
129 microscopically examined for *Sm* and other intestinal parasites [25]. Slides were examined by  
130 two independent and experienced scientists. For quality control, 15% of all positive and negative  
131 slides were re-examined by a third independent microscopist who was blinded of the results of  
132 the first two scientist. The *Sh* infection intensity was expressed as the number of eggs detected  
133 in 10ml of urine (eggs/10ml) while the *Sm* infection intensity was expressed as the number of  
134 eggs detected per gram of feces (epg). The counted eggs were categorized into light infection  
135 (1–99 epg for *Sm* and 1–49eggs/10ml for *Sh*), moderate (100–399 epg for *Sm*) and heavy  
136 infections ( $\geq 400$ epg for *Sm* and  $\geq 50$  eggs/10ml for *Sh*) [26]. Single infection was defined as  
137 passing eggs of only one species, and mixed infection as passing eggs of both *Sm* and *Sh*. The  
138 incidence of ectopic egg excretion was measured qualitatively (positive/negative). Ectopic egg  
139 elimination refers to the elimination of schistosomal eggs via the unusual route–i.e. *Sh* eggs in  
140 feces or *Sm* eggs in urine. Overall *Sm* infection refers to both mixed and single *Sm* infections.  
141 Overall *Sh* infection includes both mixed and single *Sh* infections. Each child found to be  
142 positive for any of the schistosome species was treated with 40mg/kg praziquantel by the study  
143 team.

144

## 145 **Ethics**

146 The human protocol reported in this study was ed out in accordance with the 1964 Helsinki  
147 declaration and met institutional ethics of Ladoke Akintola University College of Medicine.

148 Approval for this project was obtained from the Ethical Review Committee, Osun State Ministry  
149 of Health (approval number OSHREC/PRS/569T/131) and informed consent received from  
150 every participant or guardian before they were recruited into the study.

151

## 152 **Data analysis**

153 Data were double entered into an excel sheet, cleaned and then analyzed using IBM Statistical  
154 Package for Social Sciences (SPSS) for Windows version 20 (SPSS, Inc., city, country). Data  
155 were described using percentages, geometric means and 95% confidence interval. The egg  
156 output data was 10 log-transformed for the purpose of normalizing skewed egg distribution.  
157 Geometric means of egg count (GM egg or eggs/10 ml) were computed for microscopically  
158 positive individuals and intensity of infection analyzed. The  $\chi$ -square test was used to evaluate  
159 association between infection status (*Sm*, *Sh* and mixed infection) and disease covariates (sex,  
160 age etc). The independent-samples T-test was used to compare GM infection intensities with  
161 age and sex.

162

## 163 RESULTS

164 Complete sample comprising about 5gm of feces and 10 ml of urine from each participants  
165 were obtained from 466 primary and secondary school children. They consisted of 211 (45.3%)  
166 males and 255 (54.7%) females with a mean age of  $11.6 \pm 3.16$  years. The overall mean weight  
167 and height of the participants are  $31.2 \pm 9.60$ kg and  $1.41 \pm 0.78$ m, respectively. The breakdown of  
168 the infection according to age group showed that older age group (12-19 year) were generally  
169 more infected except for children that has mixed ectopic *Sh* infection. In all the age group  
170 comparison, no significant difference was observed. Similarly, no significant difference was  
171 observed between gender and infection prevalence, with females having higher proportion of *Sh*  
172 (57.3%), *Sm* (58.5%) single infections, and *Sh/Sm* mixed infection (54.5%). For the mixed  
173 infections of ectopic *Sm/Sh* and ectopic *Sm/Sh/Sm*, males had higher prevalence but with no  
174 significant difference (Table 1). 33.7% of the participants positive for *Sh* had blood in their urine  
175 compared to 66.3% that were positive, but without blood in their urine, and the difference was  
176 statistically significant ( $p=0.002$ ). Similarly, the proportion of the mixed infections of ectopic  
177 *Sm/Sh* ( $p=0.009$ ) and ectopic *Sm/Sh/Sm* ( $p=0.0003$ ) had a statistically significant effect on the  
178 proportion of participants with blood in urine. The mean weight and the mean height of the study

179 population is shown in Table 1. Mean weight and mean heights of positive and negative  
180 participants showed no statistically significant difference. The overall prevalence of  
181 schistosomiasis in the study was 40% (185/466). Single *Sh* infection among the participants  
182 was 19% (89/466) with a geometric egg count of 189.4egg/10mls (95%CI: 115.9-262.9) while  
183 9% (41/465) had single *Sm* infection with a geometric egg count of 115.7 epg (95%CI: 78.4-  
184 152.9). Mixed *Sh/Sm* infection was recorded in 9.5% (44/466) of the study population. Mixed  
185 ectopic *Sm* occurring along with *Sh* (Figure 1) was recorded in 4.5% (21/466) of the study  
186 population while 1(0.2%) participant had single ectopic *Sm* infection. The occurrence and  
187 distribution of *Schistosoma* infection is shown in Table 2 with an overall prevalence of 31% and  
188 10% for *Sh* and *Sm*, respectively.

189

190 The association between ectopic *Sm* egg elimination and infection intensities of *Sh* and *Sm* is  
191 shown in Table 3. High prevalence of ectopic *Sm* egg was observed in high infection intensities  
192 of both *Sh* (18%) and *Sm* (15.6%) producing a strong significant association in both cases.  
193 Figure 2 shows the relationship between age prevalence and infection intensity in the study  
194 population. Age group 12-19 years recorded higher prevalence of *Sh*, *Sm* and ectopic *Sm*  
195 infection compared to the younger age group (4-11 years), but the difference in all cases was  
196 not statistically significant. In both *Sh* and *Sm*, the younger age group (4-11 years) had higher  
197 infection intensity and was statistically significant ( $p=0.016$ ) in the *Sm* group. For the ectopic *Sm*  
198 infection group, the pattern was different as the older age group recorded the higher infection  
199 intensity but the difference was not statistically significant (Figure 2).

200

201 The relationship between sex and infection intensity in the study population is shown in Figure  
202 3. Females were more infected with both *Sh* and *Sm*, but the difference was not statistically  
203 significant. On the other hand, male recorded more ectopic *Sm* infection but the difference was  
204 not statistically significant. In both *Sh* and *Sm*, males had higher infection intensity and the

205 difference was significant in those infected with *Sh* ( $p=0.0004$ ). In ectopic *Sm*, females had  
206 higher infection intensity but the difference was not statistically significantly ([Figure 3](#)).

207

## 208 **Discussion**

209 We present the analysis of mixed *Sh* and *Sm* infections and the ectopic egg elimination of  
210 schistosome egg in school children in Osun State Nigeria. The study revealed a high prevalence  
211 of both *Sh* and *Sm* infections among school children in Ilie and Ore communities of Osun State  
212 Nigeria. The overall prevalence of schistosomiasis was 40% and as expected the prevalence of  
213 *Sh* (31%) was significantly higher than *Sm* (10%) ( $p>0.05$ ). Earlier report had shown  
214 widespread urinary schistosomiasis in the Niger River basin, the Southwest, the Central and  
215 Northern highlands, and around Lake Chad while intestinal schistosomiasis was less prevalent  
216 but also wide spread in Nigeria [27]. The various reports across the different regions of Nigeria  
217 had reported the co-occurrence of both *Sh* and *Sm* infection with prevalence ranging from 60.8  
218 to 4.8% and 8.9 to 2.9%, respectively [28–31]. The high prevalence of both *Sh* and *Sm* reported  
219 in this study reflects the high exposure of the pupils to contaminated water body that harbor the  
220 cercariae of both *Sh* and *Sm* and the possible ongoing control challenges in this area. Also  
221 more worrisome is the observation that 10% of the school children were co-infected with both  
222 urogenital and intestinal schistosomiasis. Inter-specific parasite interactions in areas with mixed  
223 species infections have been predicted to have a significant impact on host morbidity. For  
224 example lower liver morbidity has been reported in individuals with mixed infection compared to  
225 those with single *Sm* infections and higher bladder morbidity reported in those with mixed  
226 compared to those with single *Sh* infections [22]. The lowering impact of liver morbidity in  
227 individuals with mixed infections was suggested to be caused by the hybrid eggs produced by  
228 the mating of *Sh* males with *Sm* females with the deposition of such eggs in the urinary  
229 oviposition site (ectopic egg elimination) thereby reducing the amount of classical *Sm* eggs that  
230 are capable of inducing liver morbidity [22, 32]. While we observed *Sm* eggs in urine in our

231 study, *Sh* egg were not recovered in stool. By implication, with the high prevalence and high  
232 intensity of *Sh* in our study area, co-infection with *Sm* may aggravate the associated *Sh* bladder  
233 morbidity. To clarify this observation future study must investigate the impact of mixed *Sh* and  
234 *Sm* co-infections on both liver and bladder morbidity as well as other schistosomes related  
235 clinical manifestations in the study area.

236

237 A relatively high prevalence (4.7%) of lateral spine egg (*S. mansoni*) ectopic excretion was  
238 observed in the urine of participants in this study. Ectopic egg elimination (*Sh* eggs in feces and  
239 *Sm* eggs in urine) has been reported in endemic areas where both schistosome co-exist [14,  
240 33]. This phenomenon has been linked to parasite hybridization resulting from closely related  
241 sister species of schistosomes. For example *Schistosoma bovis* that causes intestinal  
242 schistosomiasis in ruminants is closely related to *Sh* and hybridization between *Sh* and *S bovis*,  
243 has been reported in Senegal [34, 35] and also linked to the outbreak of schistosomiasis in  
244 Corsica, France [18]. Similarly, hybridization between the two major human schistosomes, *Sh*  
245 and *Sm* which used to be very rare or not taken into consideration, possibly because of the  
246 assumption of the significant phylogenetic distance, has now been described in Senegal [36]  
247 and in France in a patient that originated from Côte d'Ivoire [17]. Although our study did not  
248 conduct hybridization study, the elimination of ectopic *Sm* could imply hybridization between the  
249 two human schistosomes as previously reported in Cameroon [14, 15] that may warrant further  
250 investigation. Emergence of hybrids may impact negatively on schistosomiasis control as they  
251 are well adapted to intermediate hosts, able to modify the epidemiology of the disease [16, 37,  
252 38] and spread to new areas and become invasive populations [18].

253

254 The age-related prevalence of schistosomiasis has been shown to increase as the age  
255 increases peaking in adolescence and lowering among adults [39]. Unfortunately, adults were  
256 not included in this study making it impossible to investigate this age-infection profile.

257 Nevertheless, the adolescence group was significantly more infected, but had lower intensity of  
258 infection compared to the younger age group in this study. The older children are engaged in  
259 more water contact activity leading to the observed higher prevalent but possess longer history  
260 of exposure and higher parasite-specific acquired immunity leading to lower infection intensity  
261 [39]. The prevalence of *Sh* *Sm* was higher in females, and the male students on the other  
262 hand had higher prevalence of mixed infections. Both *Sh* and *Sm* recorded higher infection  
263 intensity in male students, while for mixed infection the infection intensity was higher in female  
264 students. Previous studies have documented heavier infection in males than females in *Sh* and  
265 *Sm* contrary to what was observed in this study [40, 41] although others have agreed with this  
266 observation [42, 43]. Socio-cultural or behavioral factors focusing mainly on differences in the  
267 water contact pattern between males than females are generally implicated in the frequently  
268 observed gender-related differences in prevalence and infection intensity [4] although  
269 susceptibility factors like hormonal differences and genetic factors cannot be ruled out. The  
270 explanation for the differences in gender-related prevalence in this study may not be precise,  
271 but we may speculate that the females had higher water contact activities with a considerable  
272 longer duration of body exposure. The higher infection intensity observed in males may warrant  
273 further investigation as it generally believed that high testosterone levels in males will  
274 significantly lower the infection prevalence and intensity [44]. Since this is not the focus of our  
275 study, it is clear that more studies will be needed to actually decipher the impact of gender on  
276 infection prevalence and intensity in our study area.

277

278 A close association was observed between hematuria and the presence of *Sh* eggs in the urine,  
279 similar to the reports of Ekpo et al. (2010) [5]. The close relationship between hematuria and  
280 presence of eggs in the urine could be explored for the assessment of urinary schistosomiasis  
281 in communities. Consequently, the collection of urine specimens and their examination may not



282 be necessary in the classification of communities according to the level of endemicity of urinary  
283 schistosomiasis.

284

285 Understanding the exact relation between mixed infection and infection intensity is crucial, as  
286 increased egg loads can have important repercussions on the development of morbidity [11].  
287 Higher *Sh* and *Sm* infection intensities recorded in mixed than in single infections and a positive  
288 association between *Sh* and *Sm* infections was reported in this study. While some studies have  
289 reported higher infection intensities in mixed infections [33, 45], other studies on a larger scale  
290 have reported inconsistent results [46, 47]. Possibly, the relationship between mixed infection  
291 and infection intensity varies according to local differences in *Sm* and *Sh* transmission. Larger  
292 sample size in different locations might be needed to accurately decipher the influence of mixed  
293 schistosome infection on the infection intensity.

294

295 In summary, this study reveals the presence of high prevalence of mixed *Sh* and *Sm*; and  
296 ectopic *Sm* eggs elimination in Ilie and Ore communities of Osun State Nigeria. The results of  
297 this study indicates that some form of inter-specific interactions exist between *Sh* and *Sm*, and  
298 may produce a potentially important consequences for the development of morbidity in the study  
299 areas. Further study on the impact of mixed *Sh* and *Sm* infections on both liver and bladder  
300 morbidities as well as scaling up of mass administration of praziquantel and control efforts in the  
301 study areas is highly desirable.

302

### 303 **Acknowledgment**

304 The authors are sincerely grateful to all consenting participants, the parents of the participants  
305 and all the teachers for their co-operation. The image of the egg of *Schistosoma* was captured  
306 with the assistance of Dr. Adrian Streit in his laboratory at Max Planck Institute for Evolutionary  
307 Biology, Tuebingen

309 **References**

- 310 [1] WHO. Schistosomiasis, <https://www.who.int/news-room/fact-sheets/detail/schistosomiasis>  
311 (2020, accessed 11 May 2020).
- 312 [2] Bolaji O, Adeyeba O, Ojorongbe O, et al. Epidemiological studies on Urinary  
313 Schistosomiasis in Osun State, Nigeria by Bolaji et al., *www.ijprs.com. Int J Pharm Res*  
314 *Sch* 2014; 3: 655–662.
- 315 [3] Ezeh CO, Onyekwelu KC, Akinwale OP, et al. Urinary schistosomiasis in Nigeria: a  
316 50 year review of prevalence, distribution and disease burden. *Parasite Paris Fr* 2019; 26:  
317 19.
- 318 [4] Ojorongbe O, Sina-Agbaje OR, Busari A, et al. Efficacy of praziquantel in the treatment of  
319 *Schistosoma haematobium* infection among school-age children in rural communities of  
320 Abeokuta, Nigeria. *Infect Dis Poverty* 2014; 3: 30.
- 321 [5] Ekpo UF, Laja-Deile A, Oluwole AS, et al. Urinary schistosomiasis among preschool  
322 children in a rural community near Abeokuta, Nigeria. *Parasit Vectors* 2010; 3: 58.
- 323 [6] Steinmann P, Keiser J, Bos R, et al. Schistosomiasis and water resources development:  
324 systematic review, meta-analysis, and estimates of people at risk. *Lancet Infect Dis* 2006;  
325 6: 411–425.
- 326 [7] King CH, Galvani AP. Underestimation of the global burden of schistosomiasis. *The*  
327 *Lancet* 2018; 391: 307–308.
- 328 [8] Ciddio M, Mari L, Sokolow SH, et al. The spatial spread of schistosomiasis: A  
329 multidimensional network model applied to Saint-Louis region, Senegal. *Adv Water*  
330 *Resour* 2017; 108: 406–415.
- 331 [9] Kabore A, Ibikounle M, Tougoue JJ, et al. Initiating NTD programs targeting  
332 schistosomiasis and soil-transmitted helminthiasis in two provinces of the Democratic  
333 Republic of the Congo: Establishment of baseline prevalence for mass drug  
334 administration. *Acta Trop* 2017; 166: 177–185.
- 335 [10] King CH, Dangerfield-Cha M. The unacknowledged impact of chronic schistosomiasis.  
336 *Chronic Illn* 2008; 4: 65–79.
- 337 [11] Gryseels B, Polman K, Clerinx J, et al. Human schistosomiasis. *Lancet Lond Engl* 2006;  
338 368: 1106–1118.
- 339 [12] Khalil SB, Mansour NS. Worm development in hamsters infected with unisex and cross-  
340 mated *Schistosoma mansoni* and *Schistosoma haematobium*. *J Parasitol* 1995; 81: 8–11.
- 341 [13] Webster BL, Southgate VR, Tchuem Tchuente LA. Mating interactions between  
342 *Schistosoma haematobium* and *S. mansoni*. *J Helminthol* 1999; 73: 351–356.
- 343 [14] Cunin P, Tchuem Tchuente L-A, Poste B, et al. Interactions between *Schistosoma*  
344 *haematobium* and *Schistosoma mansoni* in humans in north Cameroon. *Trop Med Int*  
345 *Health TM IH* 2003; 8: 1110–1117.

- 346 [15] Ratard RC, Ndamkou CN, Kouemeni LE, et al. Schistosoma mansoni eggs in urine. *J*  
347 *Trop Med Hyg* 1991; 94: 348–351.
- 348 [16] Depaquit J, Akhoundi M, Haouchine D, et al. No limit in interspecific hybridization in  
349 schistosomes: observation from a case report. *Parasite Paris Fr* 2019; 26: 10.
- 350 [17] Le Govic Y, Kincaid-Smith J, Allienne J-F, et al. Schistosoma haematobium-Schistosoma  
351 mansoni Hybrid Parasite in Migrant Boy, France, 2017. *Emerg Infect Dis* 2019; 25: 365–  
352 367.
- 353 [18] Boissier J, Grech-Angelini S, Webster BL, et al. Outbreak of urogenital schistosomiasis in  
354 Corsica (France): an epidemiological case study. *Lancet Infect Dis* 2016; 16: 971–979.
- 355 [19] Tchuem Tchuente L-A, Southgate VR, Jourdane J, et al. Schistosoma intercalatum: an  
356 endangered species in Cameroon? *Trends Parasitol* 2003; 19: 389–393.
- 357 [20] Abdel-Wahab MF, Yosery A, Narooz S, et al. Is Schistosoma mansoni replacing  
358 Schistosoma haematobium in the Fayoum? *Am J Trop Med Hyg* 1993; 49: 697–700.
- 359 [21] Garba A, Labbo R, Tohon Z, et al. Emergence of Schistosoma mansoni in the Niger River  
360 valley, Niger. *Trans R Soc Trop Med Hyg* 2004; 98: 296–298.
- 361 [22] Koukounari A, Donnelly CA, Sacko M, et al. The impact of single versus mixed  
362 schistosome species infections on liver, spleen and bladder morbidity within Malian  
363 children pre- and post-praziquantel treatment. *BMC Infect Dis* 2010; 10: 1–14.
- 364 [23] Awosolu OB, Shariman YZ, Haziqah M T F, et al. Will Nigerians Win the War Against  
365 Urinary Schistosomiasis? Prevalence, Intensity, Risk Factors and Knowledge  
366 Assessment among Some Rural Communities in Southwestern Nigeria. *Pathog Basel*  
367 *Switz*, 9. Epub ahead of print 17 February 2020. DOI: 10.3390/pathogens9020128.
- 368 [24] Charan J, Biswas T. How to Calculate Sample Size for Different Study Designs in Medical  
369 Research? *Indian J Psychol Med* 2013; 35: 121–126.
- 370 [25] Katz N, Chaves A, Pellegrino J. A simple device for quantitative stool thick-smear  
371 technique in Schistosomiasis mansoni. *Rev Inst Med Trop Sao Paulo* 1972; 14: 397–400.
- 372 [26] Coulibaly JT, N'Gbesso YK, N'Guessan NA, et al. Epidemiology of Schistosomiasis in  
373 Two High-Risk Communities of South Côte d'Ivoire with Particular Emphasis on Pre-  
374 School-Aged Children. *Am J Trop Med Hyg* 2013; 89: 32–41.
- 375 [27] Jones I. The History of Schistosomiasis in Nigeria.  
376 <http://schisto.stanford.edu/pdf/Nigeria.pdf>, 2015, p. 2.
- 377 [28] Adeniran AA, Mogaji HO, Aladesida AA, et al. Schistosomiasis, intestinal helminthiasis  
378 and nutritional status among preschool-aged children in sub-urban communities of  
379 Abeokuta, Southwest, Nigeria. *BMC Res Notes* 2017; 10: 637.
- 380 [29] Aribodor DN, Basse SA, Yoonuan T, et al. Analysis of Schistosomiasis and soil-  
381 transmitted helminths mixed infections among pupils in Enugu State, Nigeria: Implications  
382 for control. *Infect Dis Health* 2019; 24: 98–106.

- 383 [30] Dawaki S, Al-Mekhlafi HM, Ithoi I, et al. PREVALENCE AND RISK FACTORS OF  
384 SCHISTOSOMIASIS AMONG HAUSA COMMUNITIES IN KANO STATE, NIGERIA. *Rev*  
385 *Inst Med Trop Sao Paulo* 2016; 58: 54.
- 386 [31] Singh K, Muddasiru D, Singh J. Current status of schistosomiasis in Sokoto, Nigeria.  
387 *Parasite Epidemiol Control* 2016; 1: 239–244.
- 388 [32] Meurs L, Mbow M, Vereecken K, et al. Bladder Morbidity and Hepatic Fibrosis in Mixed  
389 *Schistosoma haematobium* and *S. mansoni* Infections: A Population-Wide Study in  
390 Northern Senegal. *PLoS Negl Trop Dis*; 6. Epub ahead of print 27 September 2012. DOI:  
391 10.1371/journal.pntd.0001829.
- 392 [33] Meurs L, Mbow M, Vereecken K, et al. Epidemiology of mixed *Schistosoma mansoni* and  
393 *Schistosoma haematobium* infections in northern Senegal. *Int J Parasitol* 2012; 42: 305–  
394 311.
- 395 [34] Huyse T, Webster BL, Geldof S, et al. Bidirectional Introgressive Hybridization between a  
396 Cattle and Human Schistosome Species. *PLOS Pathog* 2009; 5: e1000571.
- 397 [35] Webster BL, Diaw OT, Seye MM, et al. Introgressive hybridization of *Schistosoma*  
398 *haematobium* group species in Senegal: species barrier break down between ruminant  
399 and human schistosomes. *PLoS Negl Trop Dis* 2013; 7: e2110.
- 400 [36] Huyse T, Van den Broeck F, Hellemans B, et al. Hybridisation between the two major  
401 African schistosome species of humans. *Int J Parasitol* 2013; 43: 687–689.
- 402 [37] Boon NAM, Van Den Broeck F, Faye D, et al. Barcoding hybrids: heterogeneous  
403 distribution of *Schistosoma haematobium* × *Schistosoma bovis* hybrids across the  
404 Senegal River Basin. *Parasitology* 2018; 145: 634–645.
- 405 [38] Sene-Wade M, Marchand B, Rollinson D, et al. Urogenital schistosomiasis and  
406 hybridization between *Schistosoma haematobium* and *Schistosoma bovis* in adults living  
407 in Richard-Toll, Senegal. *Parasitology* 2018; 145: 1723–1726.
- 408 [39] Mutapi F, Burchmore R, Mduluzi T, et al. Age-related and infection intensity-related shifts  
409 in antibody recognition of defined protein antigens in a schistosome-exposed population.  
410 *J Infect Dis* 2008; 198: 167–175.
- 411 [40] Kabatereine NB, Kemijumbi J, Ouma JH, et al. Epidemiology and morbidity of  
412 *Schistosoma mansoni* infection in a fishing community along Lake Albert in Uganda.  
413 *Trans R Soc Trop Med Hyg* 2004; 98: 711–718.
- 414 [41] Moira AP de, Fulford AJC, Kabatereine NB, et al. Analysis of Complex Patterns of Human  
415 Exposure and Immunity to *Schistosomiasis mansoni*: The Influence of Age, Sex, Ethnicity  
416 and IgE. *PLoS Negl Trop Dis*; 4. Epub ahead of print September 2010. DOI:  
417 10.1371/journal.pntd.0000820.
- 418 [42] Goselle NO, Anegbe D, Imandeh GN, et al. *Schistosoma mansoni* infections amongst  
419 school children in Jos, Nigeria. *Sci World J*; 5. Epub ahead of print 2010. DOI:  
420 10.4314/swj.v5i1.61485.

- 421 [43] Tefera A, Belay T, Bajiro M. Epidemiology of *Schistosoma mansoni* infection and  
422 associated risk factors among school children attending primary schools nearby rivers in  
423 Jimma town, an urban setting, Southwest Ethiopia. *PloS One* 2020; 15: e0228007.
- 424 [44] Nakazawa M, Fantappie MR, Freeman GL, et al. *Schistosoma mansoni*: susceptibility  
425 differences between male and female mice can be mediated by testosterone during early  
426 infection. *Exp Parasitol* 1997; 85: 233–240.
- 427 [45] Robert CF, Bouvier S, Rougemont A. Epidemiology of schistosomiasis in the riverine  
428 population of Lagdo Lake, northern Cameroon: mixed infections and ethnic factors. *Trop  
429 Med Parasitol Off Organ Dtsch Tropenmedizinische Ges Dtsch Ges Tech  
430 Zusammenarbeit GTZ* 1989; 40: 153–158.
- 431 [46] Ahmed ES, Daffalla A, Christensen NO, et al. Patterns of infection and transmission of  
432 human schistosomiasis mansoni and schistosomiasis haematobium in White Nile  
433 Province, Sudan. *Ann Trop Med Parasitol* 1996; 90: 173–180.
- 434 [47] Booth M, Mayombana C, Kilima P. The population biology and epidemiology of  
435 schistosome and geohelminth infections among schoolchildren in Tanzania. *Trans R Soc  
436 Trop Med Hyg* 1998; 92: 491–495.

437

438

439

440

441 **Table 1:** General characteristics and prevalence of human schistosomiasis in the study  
442 population

443 **Key:** *Sh*: *Schistosoma haematobium*; *Sm*: *Schistosoma mansoni*; *ESm*: Ectopic *Schistosoma mansoni*

444

445

446

447

448 **Table 2:** Schistosomal infection prevalence and intensities

449 **Key:** *Sh*: *Schistosoma haematobium*; *Sm*: *Schistosoma mansoni*; *ESm*: Ectopic *Schistosoma mansoni*

450

451

452

453 **Table 3:** Relation between ectopic *Schistosoma mansoni* eggs in urine and intensities of *S.*  
454 *haematobium* egg in urine and *S.mansoni* egg in stool.

455

456

457

458

459

460  
461  
462  
463  
464  
465  
466  
467  
468  
469  
470  
471  
472  
473  
474  
475  
476  
477  
478  
479  
480  
481  
482  
483  
484  
485  
486  
487

**Figure 1:** Ectopic egg elimination of *S. mansoni* in the urine of one of the study participants: **A:** *S. mansoni* egg; **B, C, D:** *S. haematobium*.

**Figure 2:** Age-prevalence and -intensity curves for schistosomias. The bars indicate overall infection prevalence per age group. Lines indicate mean log-transformed infection intensities among positive subjects. **A:** *S. haematobium* infection; Age vs prevalence  $p>0.05$ ; infection intensity vs age  $p=0.55$ . **B:** *S. mansoni* infection; Age vs prevalence  $p=0.016^*$ ; infection intensity vs age  $p=0.33$ . **C:** Ectopic egg (*S. mansoni* in urine) infection; Age vs prevalence  $p>0.05$ ; infection intensity vs age  $p=0.059$

**Figure 3:** Sex-prevalence and -intensity curves for schistosomias. The bars indicate overall infection prevalence per sex. Lines indicate mean log-transformed infection intensities among positive subjects. **A:** *S. haematobium* infection; Sex vs prevalence  $p=0.487$ ; infection intensity vs sex  $p=0.004^*$ . **B:** *S. mansoni* infection; Age vs prevalence  $p=0.883$ ; infection intensity vs age  $p=0.797$ . **C:** Ectopic egg (*S. mansoni* in urine) infection; Age vs prevalence  $p=0.073$ ; infection intensity vs age  $p=0.289$

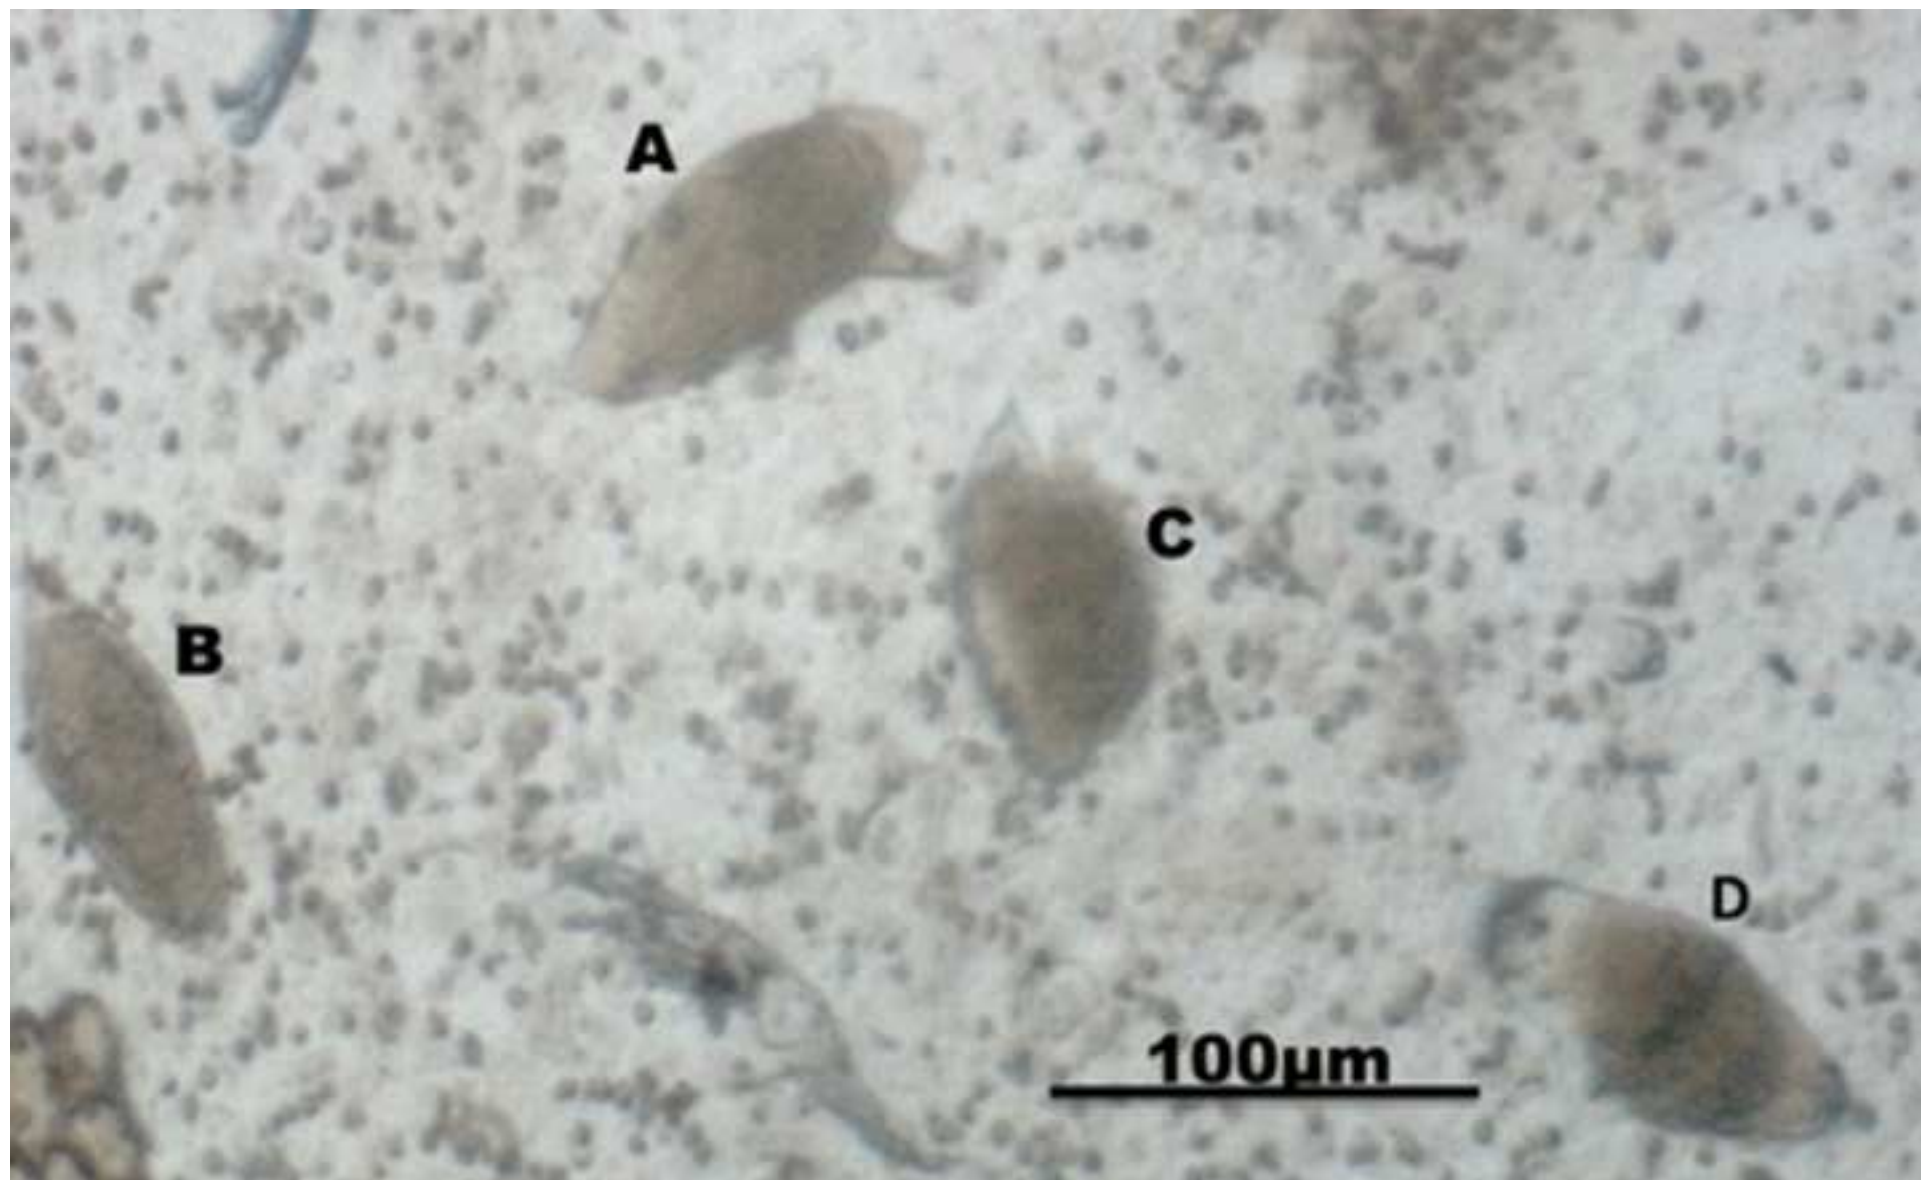



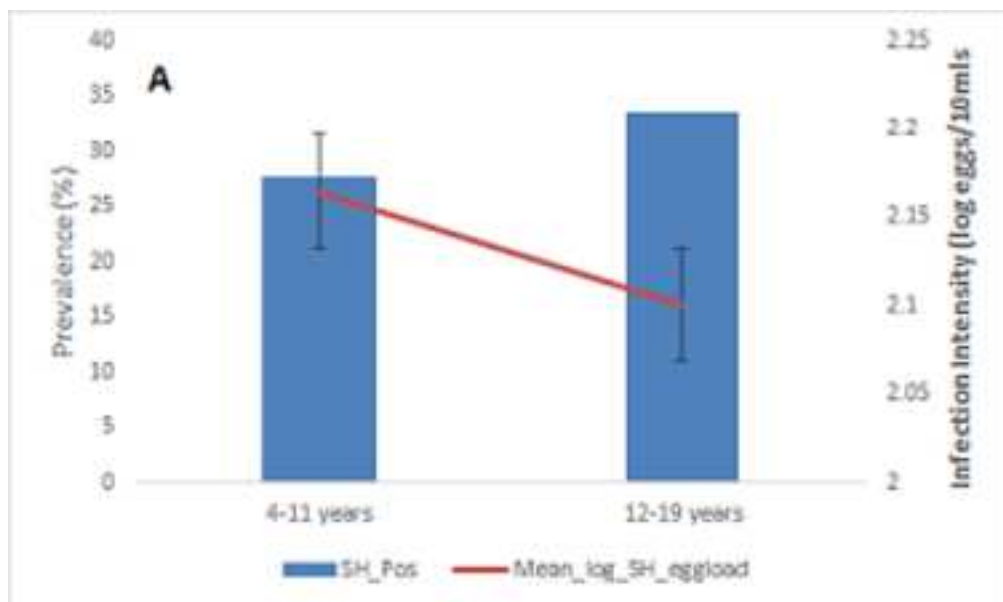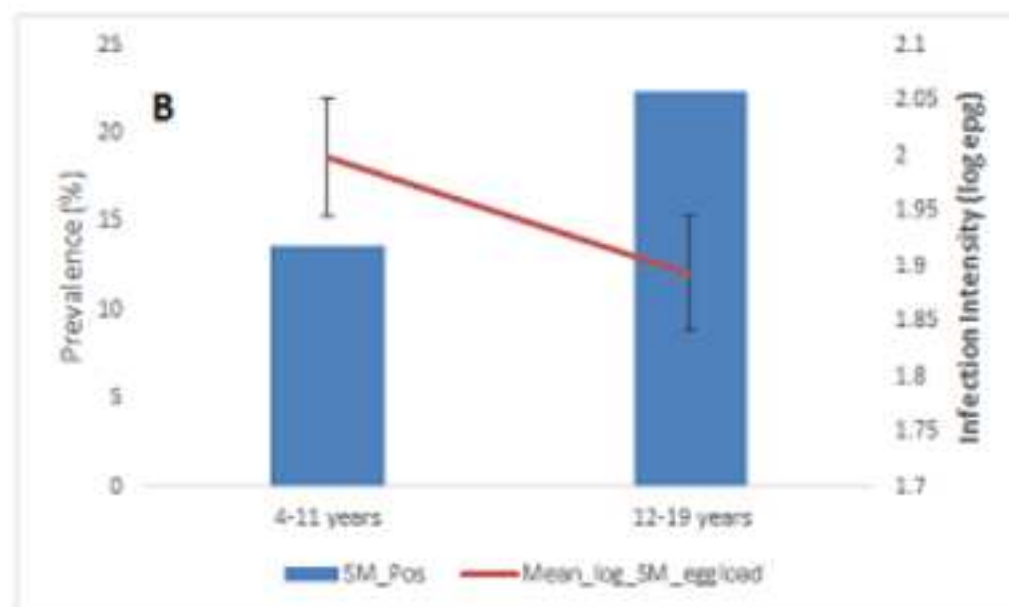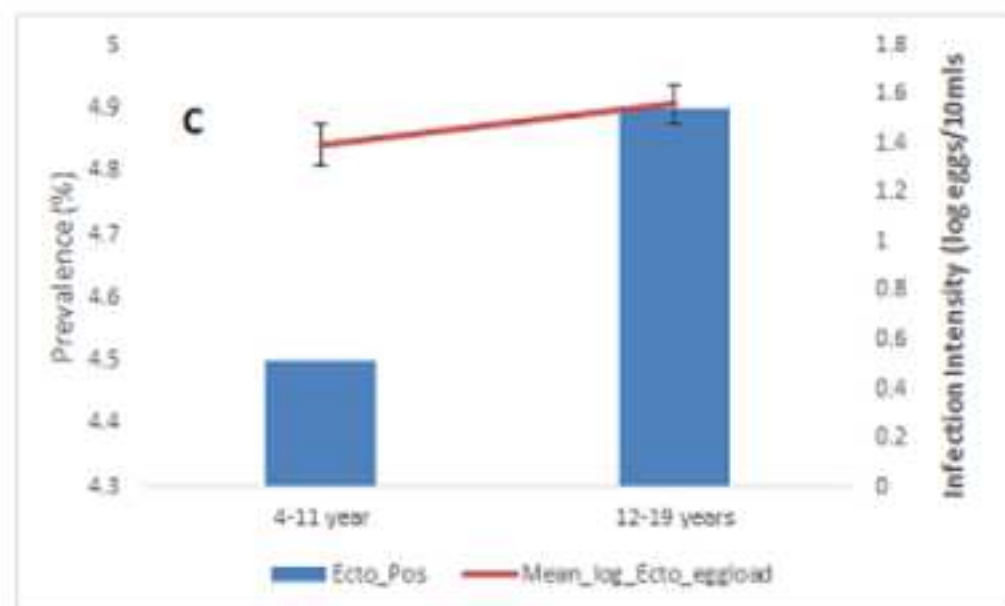

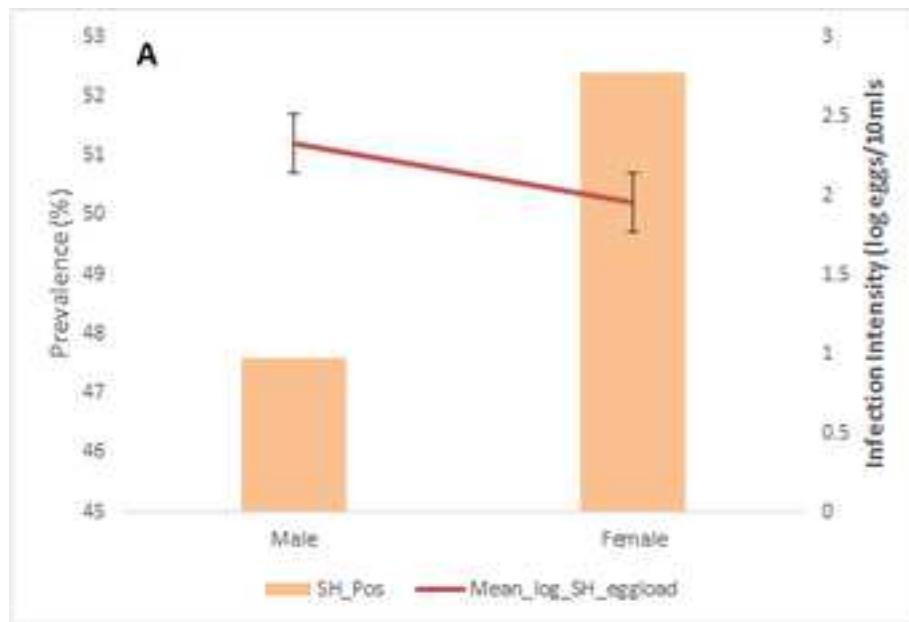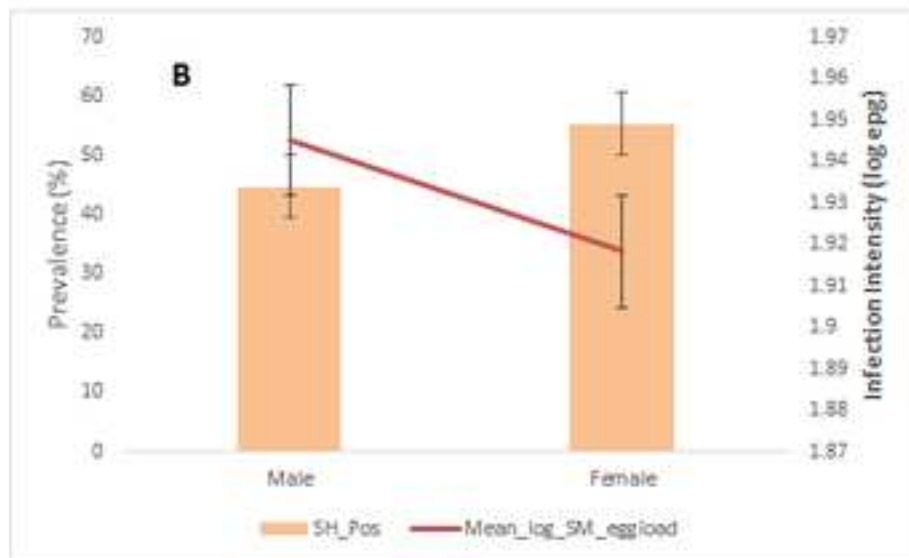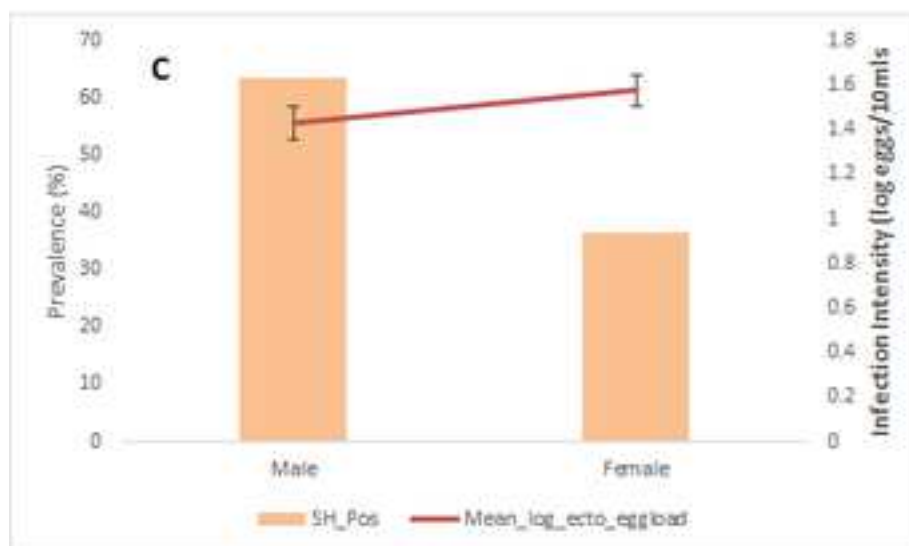

**Table 1:** General characteristics and prevalence of human schistosomiasis in the study population

| Characteristics          | Total Population | <i>Sh</i> (single infection)<br>n=89 | <i>Sm</i> (single infection)<br>n=41 | <i>Sh/Sm</i> (Mixed infection)<br>n=33 | <i>ESm</i> (single infection) n=1 | <i>ESm/Sh</i> (Mixed infection)<br>n=10 | <i>Sh/Sm/ESm</i> (Mixed infection) n=11 |
|--------------------------|------------------|--------------------------------------|--------------------------------------|----------------------------------------|-----------------------------------|-----------------------------------------|-----------------------------------------|
| <b>Mean age ± SD</b>     | 11.6±3.16        | 12.0±3.10                            | 12.5±2.70                            | 12.3±2.50                              | -                                 | 11.3±2.21                               | 12.8±3.5                                |
| <b>Mean weight ± SD</b>  | 31.2±9.60        | 32.9±9.96                            | 32.0±9.10                            | 33.8±7.74                              |                                   | 29.1±5.07                               | 33.4±10.40                              |
| <b>Mean Height± SD</b>   | 1.41±0.78        | 1.41±0.16                            | 1.69±1.98                            | 1.40±0.15                              |                                   | 1.37±0.07                               | 1.39±0.16                               |
| <b>Age group</b>         |                  |                                      |                                      |                                        |                                   |                                         |                                         |
| <b>4 – 11 years (%)</b>  | 221 (47.4)       | 40 (45.0)                            | 15 (36.6)                            | 11 (33.3)                              | 0                                 | 6 (60.0)                                | 4 (36.4)                                |
| <b>12 – 19 years (%)</b> | 245 (52.6)       | 49 (55.1)                            | 26 (63.4)                            | 22 (66.7)                              | 1 (100)                           | 4 (40.0)                                | 7 (63.6)                                |
| <b>p-value</b>           |                  | 0.638                                | 0.189                                | 0.105                                  | -                                 | 0.528                                   | 0.550                                   |
| <b>Sex</b>               |                  |                                      |                                      |                                        |                                   |                                         |                                         |
| <b>Male (%)</b>          | 211 (45.3)       | 38 (42.7)                            | 17 (41.5)                            | 15 (45.5)                              | 0                                 | 8 (80.0)                                | 6 (54.5)                                |
| <b>Female (%)</b>        | 255 (54.7)       | 51 (57.3)                            | 24 (58.5)                            | 18 (54.5)                              | 1(100)                            | 2 (20.0)                                | 5 (45.5)                                |
| <b>p-value</b>           |                  | 0.636                                | 0.627                                | 1.000                                  | -                                 | 0.050                                   | 0.556                                   |
| <b>Blood in Urine</b>    |                  |                                      |                                      |                                        |                                   |                                         |                                         |
| <b>Present</b>           | 98 (21.0)        | 30 (33.7)                            | 6 (14.6)                             | 11 (33.3)                              | 0                                 | 6 (60.0)                                | 8 (72.7)                                |
| <b>Absent</b>            | 368 (79.0)       | 59 (66.3)                            | 35 (85.4)                            | 22 (66.7)                              |                                   | 4 (40.0)                                | 3 (27.3)                                |
| <b>p-value</b>           |                  | 0.002*                               | 0.421                                | 0.079                                  |                                   | 0.009*                                  | 0.0003*                                 |

**Key:** *Sh*: *Schistosoma haematobium*; *Sm*: *Schistosoma mansoni*; *ESm*: Ectopic *Schistosoma mansoni*

**Table 2:** Schistosomal infection prevalence and intensities

|                                     | <i>Sm</i> infection                                                               |       | <i>Sm</i> infection |       | Prevalence<br>n=466 (%) | <i>Sh</i> infection<br>intensity |                    | <i>Sm</i> infection<br>intensity |                    |
|-------------------------------------|-----------------------------------------------------------------------------------|-------|---------------------|-------|-------------------------|----------------------------------|--------------------|----------------------------------|--------------------|
|                                     | Urine                                                                             | Stool | Urine               | stool |                         | GM<br>egg/<br>10 ml              | (95% CI)           | GM<br>epg                        | (95% CI)           |
| Positive participants               |                                                                                   |       |                     |       | <b>185 (40.0)</b>       |                                  |                    |                                  |                    |
| <b>Single infection</b>             |  | -     | -                   | -     | 89 (19.1)               | 189.4                            | 115.9-262.9        |                                  |                    |
|                                     | -                                                                                 | +     | -                   | -     | 0                       |                                  |                    |                                  |                    |
|                                     | -                                                                                 | -     | +                   | -     | 1 (0.2)                 |                                  |                    |                                  |                    |
|                                     | -                                                                                 | -     | -                   | +     | 41 (9.0)                |                                  |                    | 115.7                            | 78.4-152.9         |
| <b>Mixed Infections</b>             |                                                                                   |       |                     |       | <b>44 (9.5)</b>         | <b>668.6</b>                     | <b>395.4-941.8</b> | <b>229.2</b>                     | <b>100.5-357.9</b> |
| <b>E<i>Sm</i> Infection</b>         |                                                                                   |       | +                   |       | <b>21 (4.7)</b>         |                                  |                    |                                  |                    |
| Negative participants               |                                                                                   |       |                     |       | <b>281 (60.4)</b>       |                                  |                    |                                  |                    |
| Overall <b><i>Sh</i></b> infections |                                                                                   |       |                     |       | 143 (30.8)              | 399.4                            | 263.7-535.2        |                                  |                    |
| Overall <b><i>Sm</i></b> infections |                                                                                   |       |                     |       | 85 (18.3)               |                                  |                    | 174.4                            | 105.6-243.3        |

**Key:** *Sh*: *Schistosoma haematobium*; *Sm*: *Schistosoma mansoni*; E*Sm*: Ectopic *Schistosoma mansoni*

**Table 3:** Relation between ectopic *Schistosoma mansoni* eggs in urine and intensities of *S. haematobium* egg in urine and *S. mansoni* egg in stool.

| <b>Intensities of <i>Sh</i> in urine<br/>(eggs/10ml)</b> | <b><i>Sm</i> eggs in urine</b> |       |                |         |
|----------------------------------------------------------|--------------------------------|-------|----------------|---------|
|                                                          | N                              | Cases | Prevalence (%) |         |
| 0                                                        | 323                            | 1     | 0.3            |         |
| 1-9                                                      | 0                              | 0     | 0              | <0.0001 |
| 10-49                                                    | 32                             | 1     | 3.1            |         |
| ≥ 50                                                     | 111                            | 20    | 18             |         |
| Total                                                    | 466                            | 22    |                |         |
| <b>Intensity of <i>Sm</i> in stool (epg)</b>             |                                |       |                |         |
| 0                                                        | 381                            | 11    | 2.9            |         |
| 1-99                                                     | 53                             | 6     | 11.3           | 0.0003  |
| ≥ 100                                                    | 32                             | 5     | 15.6           |         |
| Total                                                    | 466                            | 22    |                |         |
